# Supplementary material for: Na2(C4O4)(H3BO3)(H2O)4·H3BO3: the first borate-squarate with strong SHG response obtained by superior synergy
Source: Royal Society of Chemistry journal article supplement (doi:10.1039/d2cc05307a), 2022-12-01
Supplement: d2cc05307a1.pdf [file d2cc05307a1.pdf]

# **$\text{Na}_2(\text{C}_4\text{O}_4)(\text{H}_3\text{BO}_3)(\text{H}_2\text{O})_4 \cdot \text{H}_3\text{BO}_3$ : The First Borate–squarate with Strong SHG Response Reduced from Superior Synergy**

Dong Yan,<sup>\*ab</sup> Yao Ma,<sup>a</sup> Hongbo Huang,<sup>c</sup> Bingbing Zhang,<sup>\*c</sup> Ru-Ling Tang,<sup>d</sup> Liang Hu,<sup>a</sup> Fei-Fei Mao,<sup>bc</sup> Jie Zheng,<sup>a</sup> Xiu-Du Zhang,<sup>a</sup> and Shu-Fang Li <sup>\*ab</sup>

*<sup>a</sup>Key Laboratory of Functional Molecular Solids, Ministry of Education, College of Chemistry and Materials Science, Anhui Normal University, Wuhu, 241002, China*

*<sup>b</sup>State Key Laboratory of Structural Chemistry, Fujian Institute of Research on the Structure of Matter, Chinese Academy of Sciences, Fuzhou 350002, P. R. China*

*<sup>c</sup>College of Science, Nanjing Agricultural University, Nanjing 210095, P. R. China.*

*<sup>d</sup>School of Chemistry and Chemical Engineering, Yangzhou University, Yangzhou, Jiangsu 225002, P. R. China*

*<sup>e</sup>College of Chemistry and Environmental Science, Hebei University, Baoding 071002, China.*

Corresponding Author

E-mail: yandong8@ahnu.edu.cn

## Supporting Information

**Section S1.** Materials and Methods.

**Table S1.** Summary of crystallographic data and structure refinement parameters for  $\text{Na}_2(\text{C}_4\text{O}_4)(\text{H}_3\text{BO}_3)(\text{H}_2\text{O})_4 \cdot \text{H}_3\text{BO}_3$ .

**Table S2.** Selected bond lengths ( $\text{\AA}$ ) for  $\text{Na}_2(\text{C}_4\text{O}_4)(\text{H}_3\text{BO}_3)(\text{H}_2\text{O})_4 \cdot \text{H}_3\text{BO}_3$ .

**Table S3.** Important bond angles ( $^\circ$ ) for  $\text{Na}_2(\text{C}_4\text{O}_4)(\text{H}_3\text{BO}_3)(\text{H}_2\text{O})_4 \cdot \text{H}_3\text{BO}_3$ .

**Table S4.** Atomic coordinates ( $\times 10^4$ ) and equivalent isotropic displacement parameters ( $\text{\AA}^2 \times 10^3$ ) for  $\text{Na}_2(\text{C}_4\text{O}_4)(\text{H}_3\text{BO}_3)(\text{H}_2\text{O})_4 \cdot \text{H}_3\text{BO}_3$ .

**Table S5.** The assignments of the infrared absorption peaks for  $\text{Na}_2(\text{C}_4\text{O}_4)(\text{H}_3\text{BO}_3)(\text{H}_2\text{O})_4 \cdot \text{H}_3\text{BO}_3$ .

**Figure S1.** Experimental and calculated XRD patterns for  $\text{Na}_2(\text{C}_4\text{O}_4)(\text{H}_3\text{BO}_3)(\text{H}_2\text{O})_4 \cdot \text{H}_3\text{BO}_3$ , inset shows selected crystals photograph.

**Figure S2.** The UV-vis diffuse reflectance spectrum and infrared (IR) spectrum of  $\text{Na}_2(\text{C}_4\text{O}_4)(\text{H}_3\text{BO}_3)(\text{H}_2\text{O})_4 \cdot \text{H}_3\text{BO}_3$ .

**Figure S3.** TGA and DTA curves for  $\text{Na}_2(\text{C}_4\text{O}_4)(\text{H}_3\text{BO}_3)(\text{H}_2\text{O})_4 \cdot \text{H}_3\text{BO}_3$ .

**Figure S4.** Calculated band structure for  $\text{Na}_2(\text{C}_4\text{O}_4)(\text{H}_3\text{BO}_3)(\text{H}_2\text{O})_4 \cdot \text{H}_3\text{BO}_3$ .

**Figure S5.** The (100) projection of the electron localization function (ELF) for  $\text{Na}_2(\text{C}_4\text{O}_4)(\text{H}_3\text{BO}_3)(\text{H}_2\text{O})_4 \cdot \text{H}_3\text{BO}_3$ .

**Figure S6.** (a) Original interference color of the  $\text{Na}_2(\text{C}_4\text{O}_4)(\text{H}_3\text{BO}_3)(\text{H}_2\text{O})_4 \cdot \text{H}_3\text{BO}_3$  crystal under orthogonal polarized light. (b)  $\text{Na}_2(\text{C}_4\text{O}_4)(\text{H}_3\text{BO}_3)(\text{H}_2\text{O})_4 \cdot \text{H}_3\text{BO}_3$  crystal under complete extinction. (c) Thickness of the selected  $\text{Na}_2(\text{C}_4\text{O}_4)(\text{H}_3\text{BO}_3)(\text{H}_2\text{O})_4 \cdot \text{H}_3\text{BO}_3$  crystal plate. (d) Crystal orientation of the  $\text{Na}_2(\text{C}_4\text{O}_4)(\text{H}_3\text{BO}_3)(\text{H}_2\text{O})_4 \cdot \text{H}_3\text{BO}_3$  crystal indexed by single-crystal XRD measurement.

## Section S1 Materials and Methods.

### Reagents and Instruments

The raw materials of  $\text{Na}_2\text{B}_4\text{O}_7 \cdot 5\text{H}_2\text{O}$  (Macklin Chemistry Co., Ltd., 99.5%),  $\text{C}_4\text{H}_2\text{O}_4$  (Macklin Chemistry Co., Ltd., 98%) and  $\text{CF}_3\text{COOH}$  (Macklin Chemistry Co., Ltd., 99.0%) were used without further purification.

Colorless single crystals of  $\text{Na}_2(\text{C}_4\text{O}_4)(\text{H}_3\text{BO}_3)(\text{H}_2\text{O})_4 \cdot \text{H}_3\text{BO}_3$  were synthesized using a mild hydrothermal method. The added reagents were  $\text{Na}_2\text{B}_4\text{O}_7 \cdot 5\text{H}_2\text{O}$  (0.2916 g, 1 mmol),  $\text{C}_4\text{H}_2\text{O}_4$  (0.1145 g, 1 mmol),  $\text{CF}_3\text{COOH}$  (0.2 mL), and deionized water (4 mL), respectively. The raw reagents were mixed in a 23 mL Teflon-lined autoclave, and then the autoclave was heated to 220 degrees Celsius in three hours and maintained for two days, then cooled to room temperature at a rate of 10 degrees Celsius per hour. Block crystals of **1** were disposed via filtration, which were washed with deionized water, and dried in air (65% yield based on Na). *Anal. Calcd* for **1** ( $M_r = 353.75$ ): C, 13.58%; H, 3.99%; O, 63.32%; B, 6.11%; Na, 13.00%. Found: C, 13.39%; H, 3.83%; O, 63.75%; B, 5.93%; Na, 12.89%. The crystallographic data, important bond lengths and bond angles are presented in Table S1–4. As shown in **Figure S1**, the experimental powder X-ray diffraction data (XRD) pattern was consistent with that simulated from the single crystal XRD data.

Powder X-ray diffraction (PXRD) patterns were collected in the  $2\theta$  range of  $5^\circ$ – $60^\circ$  with a step size of  $0.02^\circ$  on a Panalytical X'pert Pro MPD diffractometer equipped with graphite-monochromated Cu K $\alpha$  radiation. A field emission scanning electron microscope (JSM6700F) equipped with an energy-dispersive X-ray spectroscopy (Oxford INCA) was used for microprobe elemental analyses. In the range of  $4000$ – $400\text{ cm}^{-1}$ , IR spectra were recorded on a Magna 750 FT-IR spectrometer as KBr pellets. At room temperature, a PerkinElmer Lambda 950 UV–vis–NIR spectrophotometer was used to measure the UV–vis–NIR optical diffuse reflectance spectra. A  $\text{BaSO}_4$  plate was used as a standard (100% reflectance). The Kubelka–Munk function  $F(R) = (1-R)^2/2R = \alpha/S$  was used for the calculation of the absorption ( $\alpha/S$ ) data from the reflectance spectra, where  $\alpha$  is the absorption coefficient,  $R$  is the reflectance, and  $S$  is the scattering coefficient which is practically wavelength independent when the particle size is larger than  $5\text{ }\mu\text{m}$ .<sup>1-2</sup> According to the intercept by extrapolating the

straightest line to the  $h\nu$  axis in the  $\alpha/S$  versus  $h\nu$  plot, the band gaps were calculated. Under nitrogen atmosphere, a NETZSCH STA449C instrument was used to simultaneously measure thermogravimetric analysis (TGA) at a heating rate of 5 °C min<sup>-1</sup>. Using an Ultima 2 simultaneous inductively coupled plasma (ICP) optical emission spectrometer, the ICP elemental analysis on K was performed. A German Elementary Vario EL III instrument was used to perform the elemental analyses on C, H, and O elements.

### Crystal Structure Determinations

Na<sub>2</sub>(C<sub>4</sub>O<sub>4</sub>)(H<sub>3</sub>BO<sub>3</sub>)(H<sub>2</sub>O)<sub>4</sub>·H<sub>3</sub>BO<sub>3</sub> was collected by using a SuperNova Dual Wavelength CCD diffractometer with a monochromatic Mo K $\alpha$  radiation ( $\lambda = 0.71073$  Å) at 273 K. All datasets and absorption were corrected by the Lorentz and polarization factors and a multi-scan method. On the basis of full matrix least-squares fitting on  $F^2$  using SHELX-97, the structure was solved by using the direct method and refined.<sup>3</sup> All of the non-hydrogen atoms were refined anisotropically. The hydrogen atoms bonded to carbon atoms were refined with isotropic thermal parameters and located at geometrically calculated positions. The H-atoms associated with water molecules in Na<sub>2</sub>(C<sub>4</sub>O<sub>4</sub>)(H<sub>3</sub>BO<sub>3</sub>)(H<sub>2</sub>O)<sub>4</sub>·H<sub>3</sub>BO<sub>3</sub> were included in the final refinements. The Flack factor is refined to be 0.51 (2) for Na<sub>2</sub>(C<sub>4</sub>O<sub>4</sub>)(H<sub>3</sub>BO<sub>3</sub>)(H<sub>2</sub>O)<sub>4</sub>·H<sub>3</sub>BO<sub>3</sub>, indicating that there exists a small degree of racemic twinning in Na<sub>2</sub>(C<sub>4</sub>O<sub>4</sub>)(H<sub>3</sub>BO<sub>3</sub>)(H<sub>2</sub>O)<sub>4</sub>·H<sub>3</sub>BO<sub>3</sub>.<sup>4-5</sup> For checking the correctness of the space group adopted by these compounds, the program PLATON was applied.<sup>6</sup>

### Second harmonic generation measurements

Powder SHG measurements of Na<sub>2</sub>(C<sub>4</sub>O<sub>4</sub>)(H<sub>3</sub>BO<sub>3</sub>)(H<sub>2</sub>O)<sub>4</sub>·H<sub>3</sub>BO<sub>3</sub> were performed with a Q-switched Nd:YAG laser of 1064 nm by using the method of Kurtz and Perry at room temperature.<sup>7</sup> The SHG effect depends intensely on the particle size, and Na<sub>2</sub>(C<sub>4</sub>O<sub>4</sub>)(H<sub>3</sub>BO<sub>3</sub>)(H<sub>2</sub>O)<sub>4</sub>·H<sub>3</sub>BO<sub>3</sub> crystalline samples were sieved into the following particle sizes: 45–75, 75–105, 105–150, 150–200, and 200–250  $\mu$ m. Sieved KDP samples in the same particle-size ranges were used as references. Since Na<sub>2</sub>(C<sub>4</sub>O<sub>4</sub>)(H<sub>3</sub>BO<sub>3</sub>)(H<sub>2</sub>O)<sub>4</sub>·H<sub>3</sub>BO<sub>3</sub> belongs to  $mm2$  point group and three nonvanishing independent tensors left ( $d_{113} = d_{311}$ ,  $d_{223} = d_{322}$ ,  $d_{333}$ ),<sup>7</sup> effective SHG tensor  $d_{\text{eff}}$  can be simplified as:

$$\langle d^2 \rangle = \frac{19}{105}d_{333}^2 + \frac{13}{105}d_{333}(d_{311} + d_{322}) + \frac{44}{105}(d_{113}^2 + d_{223}^2) + \frac{26}{105}d_{113}d_{322}$$

## Computational Descriptions

The structure of  $\text{Na}_2(\text{C}_4\text{O}_4)(\text{H}_3\text{BO}_3)(\text{H}_2\text{O})_4 \cdot \text{H}_3\text{BO}_3$  determined from single-crystal XRD analysis were adopted in the theoretical calculations. The band structures, densities of states (DOS), and optical dielectric constants of  $\text{Na}_2(\text{C}_4\text{O}_4)(\text{H}_3\text{BO}_3)(\text{H}_2\text{O})_4 \cdot \text{H}_3\text{BO}_3$  were calculated based on density functional theory (DFT) with CASTEP module implemented in the Materials Studio package.<sup>8-10</sup> The valence electrons were treated as H:  $1s^1$ , C:  $2s^2 2p^2$ , O:  $2s^2 2p^4$ , B:  $2s^2 2p^3$  and Na:  $2s^2 2p^6$ . The plane-wave cutoff energy is 517.0 eV. The numerical integration of the Brillouin zone was performed by utilizing Monkhorst–Pack  $k$ -point meshes  $4 \times 4 \times 2$ . The Fermi level ( $E_f = 0$  eV) was chosen as the reference. In order to make the calculated electronic structure closer to the actual situation, we set the scissors operator value as 0.5 eV.

The optical properties were calculated and are described in terms of the complex dielectric function  $\varepsilon(\omega) = \varepsilon_1(\omega) + i\varepsilon_2(\omega)$ . The imaginary part of the dielectric function  $\varepsilon_2(\omega)$  is given by Equation (1):<sup>11-12</sup>

$$\varepsilon_2(\omega) = \frac{2e^2\pi}{\Omega\varepsilon_0} \sum_{K,V,C} |\langle \Psi_K^C | \hat{u} \cdot \mathbf{r} | \Psi_K^V \rangle|^2 \delta(E_K^C - E_K^V - E) \quad (1)$$

where  $\delta(E_K^C - E_K^V - E)$  defines the energy difference between the conduction and valence bands at the  $k$  point with absorption of energy  $E$ ,  $\hat{u}$  denotes the polarization of the incident electric field,  $\Omega$  is the volume of the primitive cell,  $e$  is the electric charge, and  $\Psi_K^C$  and  $\Psi_K^V$  are the vectors defining the conduction and valence band wave functions at  $k$ , respectively. And  $\varepsilon_1(\omega)$  can be obtained by using the dispersion relationship of Kramers–Kronig:

$$\varepsilon_1(\omega) = 1 + \frac{2}{\pi} P \int_0^\infty \frac{\omega' \varepsilon_2(\omega')}{\omega'^2 - \omega^2} d\omega' \quad (2)$$

The  $P$  in front of the integral means the principal value. The first-order nonresonant susceptibility at the low-frequency region is given by  $\chi^{(1)}(\omega) = \varepsilon_1(\omega) - 1$ , and the second-order susceptibilities can be expressed in terms of the first-order susceptibilities as follows:<sup>13</sup>

$$\chi_{ijk}^{(2)}(\omega_3, \omega_1, \omega_2) = \frac{\text{ma}}{N^2 e^3} \chi_{ii}^{(1)}(\omega_3) \chi_{jj}^{(1)}(\omega_1) \chi_{kk}^{(1)}(\omega_2), \quad (3)$$



**Table S1.** Summary of crystallographic data and structure refinement parameters for  $\text{Na}_2(\text{C}_4\text{O}_4)(\text{H}_3\text{BO}_3)(\text{H}_2\text{O})_4 \cdot \text{H}_3\text{BO}_3$ .

| Empirical formula                      | $\text{B}_2\text{C}_4\text{H}_{14}\text{Na}_2\text{O}_{14}$ |
|----------------------------------------|-------------------------------------------------------------|
| Formula weight                         | 353.75                                                      |
| Crystal system                         | Orthorhombic                                                |
| Space group                            | $Cmc2_1$                                                    |
| $a$ (Å)                                | 6.9595(4)                                                   |
| $b$ (Å)                                | 16.1485(14)                                                 |
| $c$ (Å)                                | 12.5850(11)                                                 |
| $\alpha$ (°)                           | 90                                                          |
| $\beta$ (°)                            | 90                                                          |
| $\gamma$ (°)                           | 90                                                          |
| $V$ (Å <sup>3</sup> )                  | 1414.37(19)                                                 |
| $Z$                                    | 4                                                           |
| $D_{\text{cal}}$ (g cm <sup>-3</sup> ) | 1.661                                                       |
| $\mu$ (mm <sup>-1</sup> )              | 0.214                                                       |
| $\theta$ range (°)                     | 3.187–27.500                                                |
| GOF on $F^2$                           | 1.050                                                       |
| $R_1^a$ [ $I > 2\sigma(I)$ ]           | 0.0349                                                      |
| $wR_2^b$ [ $I > 2\sigma(I)$ ]          | 0.0671                                                      |
| $R_1^a$ (all data)                     | 0.0609                                                      |
| $wR_2^b$ (all data)                    | 0.0753                                                      |
| Flack parameter $x$                    | 0.51(2)                                                     |

$$^a R_1 = \sum ||F_o| - |F_c|| / \sum |F_o|, wR_2 = \{ \sum w[(F_o)^2 - (F_c)^2]^2 / \sum w[(F_o)^2]^2 \}^{1/2}$$

**Table S2.** Selected bond lengths (Å) for Na<sub>2</sub>(C<sub>4</sub>O<sub>4</sub>)(H<sub>3</sub>BO<sub>3</sub>)(H<sub>2</sub>O)<sub>4</sub>·H<sub>3</sub>BO<sub>3</sub>.

|              |            |            |          |
|--------------|------------|------------|----------|
| Na(1)-O(2)   | 2.338(3)   | B(1)-O(2)  | 1.365(4) |
| Na(1)-O(4)   | 2.3461(17) | B(1)-O(3)  | 1.356(4) |
| Na(1)-O(4)#1 | 2.3461(17) | B(2)-O(10) | 1.349(4) |
| Na(1)-O(5)   | 2.3452(16) | B(2)-O(11) | 1.378(4) |
| Na(1)-O(5)#1 | 2.3452(16) | B(2)-O(12) | 1.362(4) |
| Na(1)-O(6)   | 2.376(2)   | C(1)-O(6)  | 1.241(4) |
| Na(2)-O(3)   | 2.499(3)   | C(2)-O(7)  | 1.240(4) |
| Na(2)-O(4)#2 | 2.3685(17) | C(3)-O(8)  | 1.271(4) |
| Na(2)-O(4)#3 | 2.3685(17) | C(4)-O(9)  | 1.262(4) |
| Na(2)-O(5)   | 2.3369(17) | C(1)-C(2)  | 1.482(4) |
| Na(2)-O(5)#1 | 2.3369(17) | C(1)-C(3)  | 1.452(4) |
| Na(2)-O(7)   | 2.357(3)   | C(2)-C(4)  | 1.464(4) |
| B(1)-O(1)    | 1.360(4)   | C(3)-C(4)  | 1.455(4) |

<sup>a</sup>Symmetry transformations used to generate equivalent atoms:

#1 -x+1, y, z; #2 -x+1, -y+1, z+1/2; #3 x, -y+1, z+1/2.

**Table S3.** Important bond angles (°) for Na<sub>2</sub>(C<sub>4</sub>O<sub>4</sub>)(H<sub>3</sub>BO<sub>3</sub>)(H<sub>2</sub>O)<sub>4</sub>·H<sub>3</sub>BO<sub>3</sub>.

|                     |            |                   |            |
|---------------------|------------|-------------------|------------|
| Na(1)-O(4)-Na(2)#2  | 89.00(6)   | O(5)-Na(2)-O(5)#1 | 95.48(9)   |
| Na(2)-O(5)-Na(1)    | 84.74(6)   | O(5)-Na(2)-O(7)   | 94.84(7)   |
| O(2)-Na(1)-O(4)     | 94.28(6)   | O(7)-Na(2)-O(3)   | 174.80(11) |
| O(2)-Na(1)-O(4)#1   | 94.28(6)   | O(7)-Na(2)-O(4)#3 | 96.88(7)   |
| O(2)-Na(1)-O(5)     | 84.88(6)   | O(7)-Na(2)-O(4)#4 | 96.88(7)   |
| O(2)-Na(1)-O(5)#1   | 84.88(6)   | O(6)-C(1)-C(2)    | 135.7(3)   |
| O(2)-Na(1)-O(6)     | 167.80(10) | O(6)-C(1)-C(3)    | 134.6(3)   |
| O(4)#1-Na(1)-O(6)   | 94.31(6)   | O(7)-C(2)-C(1)    | 136.3(3)   |
| O(4)#3-Na(2)-O(3)   | 86.80(7)   | O(7)-C(2)-C(4)    | 134.6(3)   |
| O(4)#3-Na(2)-O(4)#4 | 89.27(8)   | O(8)-C(3)-C(1)    | 133.6(3)   |
| O(4)#4-Na(2)-O(3)   | 86.80(7)   | O(8)-C(3)-C(4)    | 135.7(3)   |
| O(4)-Na(1)-O(4)#1   | 90.36(8)   | O(9)-C(4)-C(2)    | 133.4(3)   |
| O(4)-Na(1)-O(6)     | 94.31(6)   | O(9)-C(4)-C(3)    | 136.3(3)   |
| O(5)#1-Na(1)-O(4)   | 87.29(5)   | O(1)-B(1)-O(2)    | 118.7(3)   |
| O(5)#1-Na(1)-O(4)#1 | 177.44(7)  | O(3)-B(1)-O(2)    | 116.1(3)   |
| O(5)#1-Na(1)-O(5)   | 95.03(8)   | O(3)-B(1)-O(1)    | 125.2(3)   |
| O(5)#1-Na(1)-O(6)   | 86.90(6)   | O(10)-B(2)-O(11)  | 118.5(3)   |
| O(5)#1-Na(2)-O(3)   | 81.69(6)   | O(10)-B(2)-O(12)  | 126.0(3)   |
| O(5)#1-Na(2)-O(4)#3 | 167.91(8)  | O(12)-B(2)-O(11)  | 115.6(3)   |
| O(5)#1-Na(2)-O(4)#4 | 86.44(5)   | C(1)-C(3)-C(4)    | 90.7(2)    |
| O(5)#1-Na(2)-O(7)   | 94.84(7)   | C(3)-C(1)-C(2)    | 89.8(2)    |
| O(5)-Na(1)-O(4)     | 177.44(7)  | C(3)-C(4)-C(2)    | 90.3(2)    |
| O(5)-Na(1)-O(4)#1   | 87.29(5)   | C(4)-C(2)-C(1)    | 89.2(2)    |
| O(5)-Na(1)-O(6)     | 86.89(6)   | C(1)-O(6)-Na(1)   | 138.2(2)   |
| O(5)-Na(2)-O(3)     | 81.69(6)   | C(2)-O(7)-Na(2)   | 127.2(2)   |
| O(5)-Na(2)-O(4)#3   | 86.44(5)   | B(1)-O(2)-Na(1)   | 132.6(2)   |
| O(5)-Na(2)-O(4)#4   | 167.92(8)  | B(1)-O(3)-Na(2)   | 131.5(2)   |

<sup>a</sup>Symmetry transformations used to generate equivalent atoms:

#1 -x+1, y, z; #2 -x+1, -y+1, z-1/2; #3 -x+1, -y+1, z+1/2; #4 x, -y+1, z+1/2.

**Table S4.** Atomic coordinates ( $\times 10^4$ ) and equivalent isotropic displacement parameters ( $\text{\AA}^2 \times 10^3$ ) for  $\text{Na}_2(\text{C}_4\text{O}_4)(\text{H}_3\text{BO}_3)(\text{H}_2\text{O})_4 \cdot \text{H}_3\text{BO}_3$ .  $U_{\text{eq}}$  is defined as one third of the trace of the orthogonalized  $U_{ij}$  tensor.

| Atom  | $x$     | $y$     | $z$     | $U_{\text{eq}}$ |
|-------|---------|---------|---------|-----------------|
| Na(1) | 5000    | 5105(1) | 2962(1) | 29(1)           |
| Na(2) | 5000    | 4568(1) | 5372(1) | 30(1)           |
| O(8)  | 5000    | 1757(1) | 1903(2) | 33(1)           |
| O(1)  | 5000    | 7534(1) | 4914(2) | 41(1)           |
| O(12) | 0       | 3986(1) | 1504(2) | 34(1)           |
| O(9)  | 5000    | 1216(1) | 4411(2) | 33(1)           |
| O(11) | 0       | 3631(1) | 3288(2) | 33(1)           |
| O(7)  | 5000    | 3126(1) | 5089(2) | 37(1)           |
| O(5)  | 7485(2) | 4835(1) | 4171(1) | 33(1)           |
| O(4)  | 2609(2) | 5413(1) | 1710(1) | 34(1)           |
| O(6)  | 5000    | 3664(1) | 2589(2) | 40(1)           |
| O(2)  | 5000    | 6431(1) | 3706(2) | 40(1)           |
| O(10) | 0       | 2552(2) | 2045(2) | 43(1)           |
| O(3)  | 5000    | 6112(2) | 5492(2) | 40(1)           |
| C(4)  | 5000    | 1889(2) | 3902(2) | 25(1)           |
| C(2)  | 5000    | 2760(2) | 4223(2) | 26(1)           |
| C(3)  | 5000    | 2133(2) | 2789(2) | 25(1)           |
| C(1)  | 5000    | 3001(2) | 3088(3) | 27(1)           |
| B(1)  | 5000    | 6705(2) | 4731(3) | 28(1)           |
| B(2)  | 0       | 3372(2) | 2246(3) | 30(1)           |

**Table S5.** The assignments of the infrared absorption peaks for  $\text{Na}_2(\text{C}_4\text{O}_4)(\text{H}_3\text{BO}_3)(\text{H}_2\text{O})_4 \cdot \text{H}_3\text{BO}_3$ .

| Assignments                                         | Absorption bands ( $\text{cm}^{-1}$ ) |
|-----------------------------------------------------|---------------------------------------|
| asymmetric stretching of H-O                        | 3540-3089                             |
| in-plane bending of the B-O-H groups                | 2381,2261                             |
| the bending of group H-O-H                          | 1640,1604                             |
| asymmetric stretching of B-O                        | 1527,1481                             |
| deformation vibration of C-(C=)-C                   | 1208,1126                             |
| symmetric stretching of B-O                         | 879,831                               |
| plane bending of the $[\text{BO}_3]^{3-}$ triangles | 671-547                               |

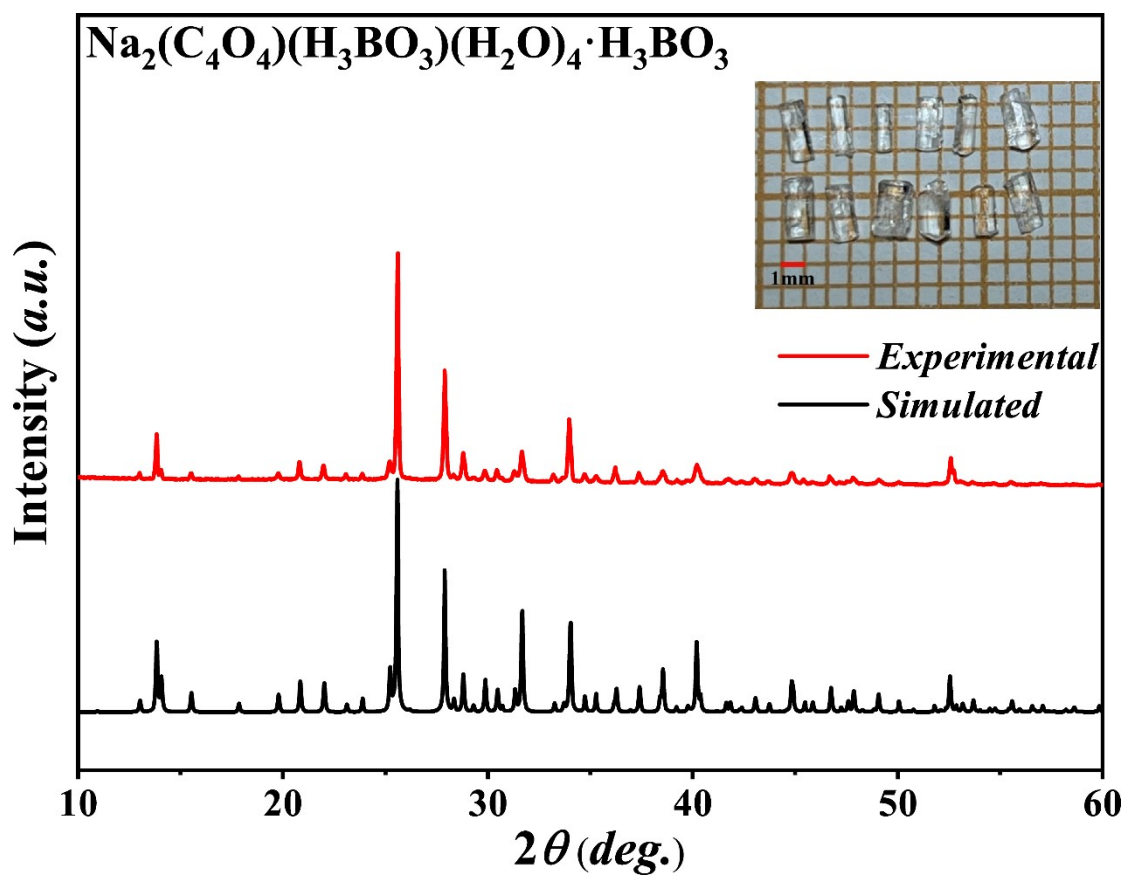

**Figure S1.** Experimental and calculated XRD patterns for  $\text{Na}_2(\text{C}_4\text{O}_4)(\text{H}_3\text{BO}_3)(\text{H}_2\text{O})_4 \cdot \text{H}_3\text{BO}_3$ , inset shows selected crystals photograph.

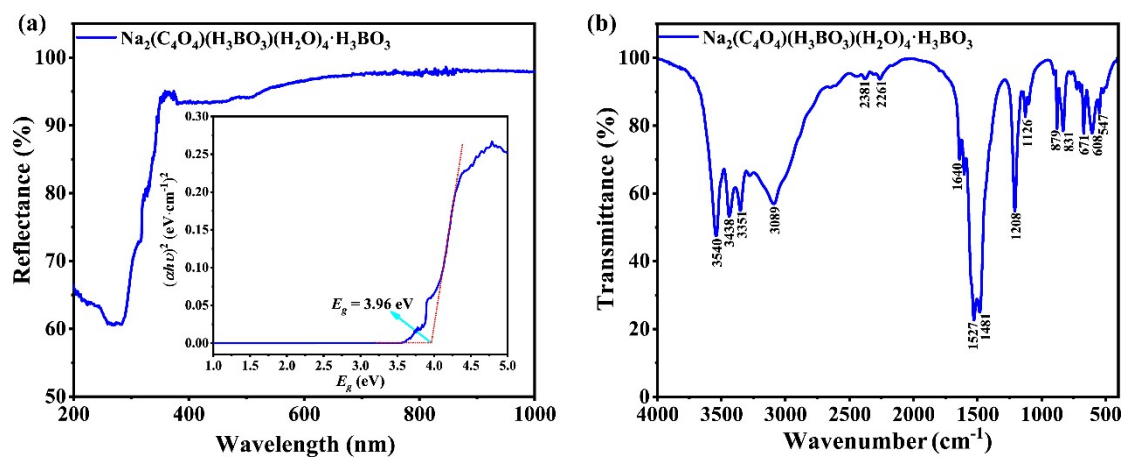

**Figure S2.** The UV-vis diffuse reflectance spectrum (a) and infrared (IR) spectrum (b) of  $\text{Na}_2(\text{C}_4\text{O}_4)(\text{H}_3\text{BO}_3)(\text{H}_2\text{O})_4 \cdot \text{H}_3\text{BO}_3$ .

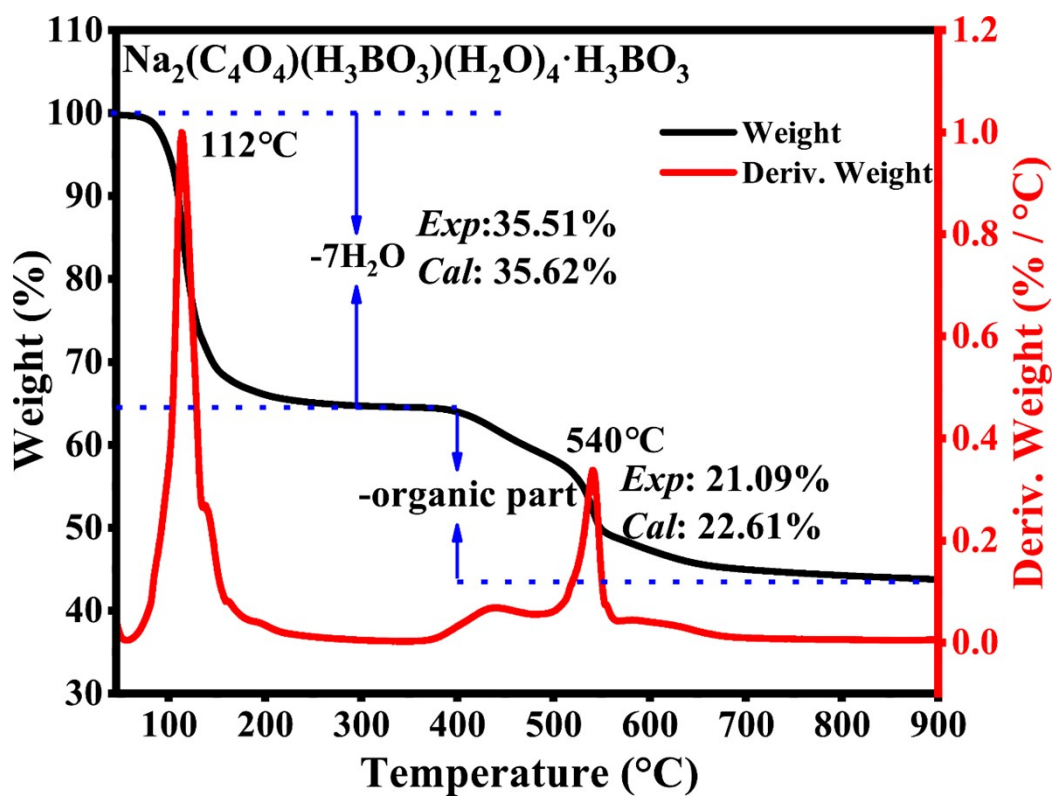

Figure S3. TGA and DTA curves for  $\text{Na}_2(\text{C}_4\text{O}_4)(\text{H}_3\text{BO}_3)(\text{H}_2\text{O})_4 \cdot \text{H}_3\text{BO}_3$ .

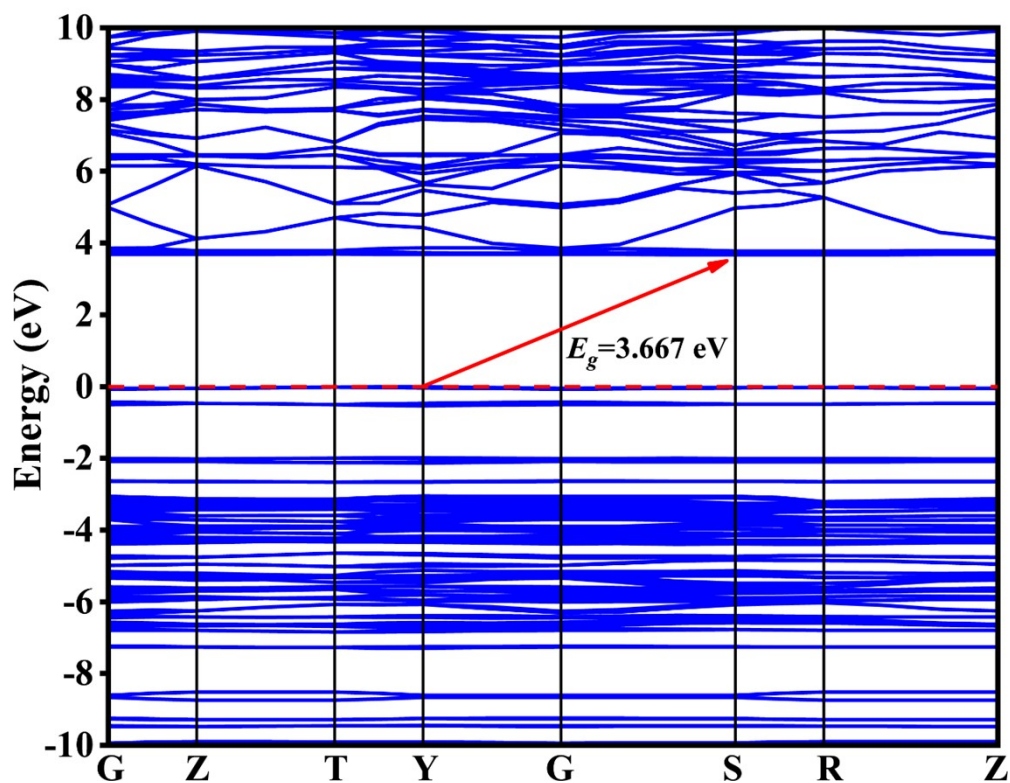

Figure S4. Calculated band structure for  $\text{Na}_2(\text{C}_4\text{O}_4)(\text{H}_3\text{BO}_3)(\text{H}_2\text{O})_4 \cdot \text{H}_3\text{BO}_3$ .

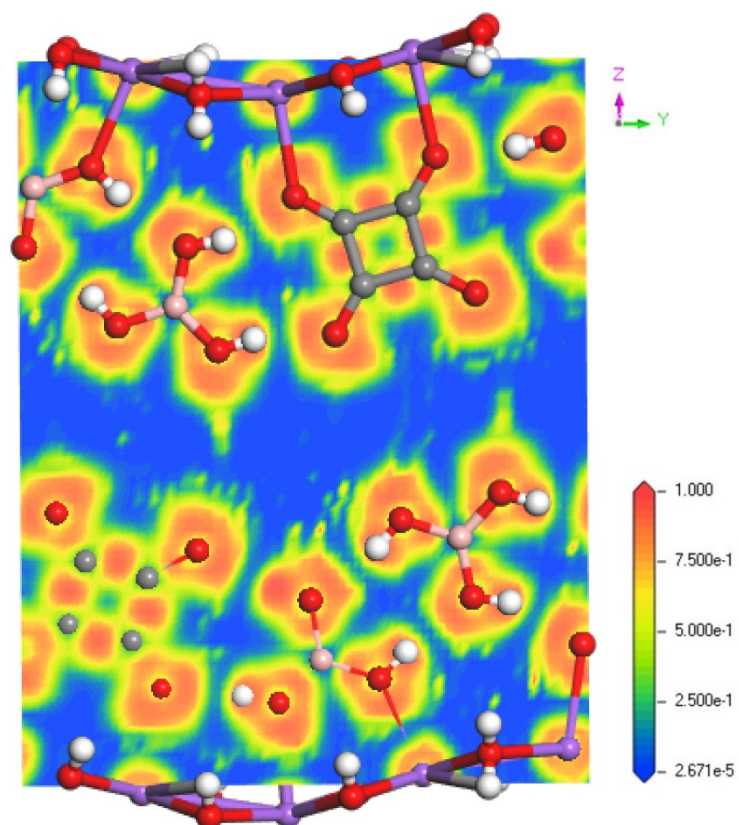

**Figure S5.** The (100) projection of the electron localization function (ELF) for  $\text{Na}_2(\text{C}_4\text{O}_4)(\text{H}_3\text{BO}_3)(\text{H}_2\text{O})_4 \cdot \text{H}_3\text{BO}_3$ .

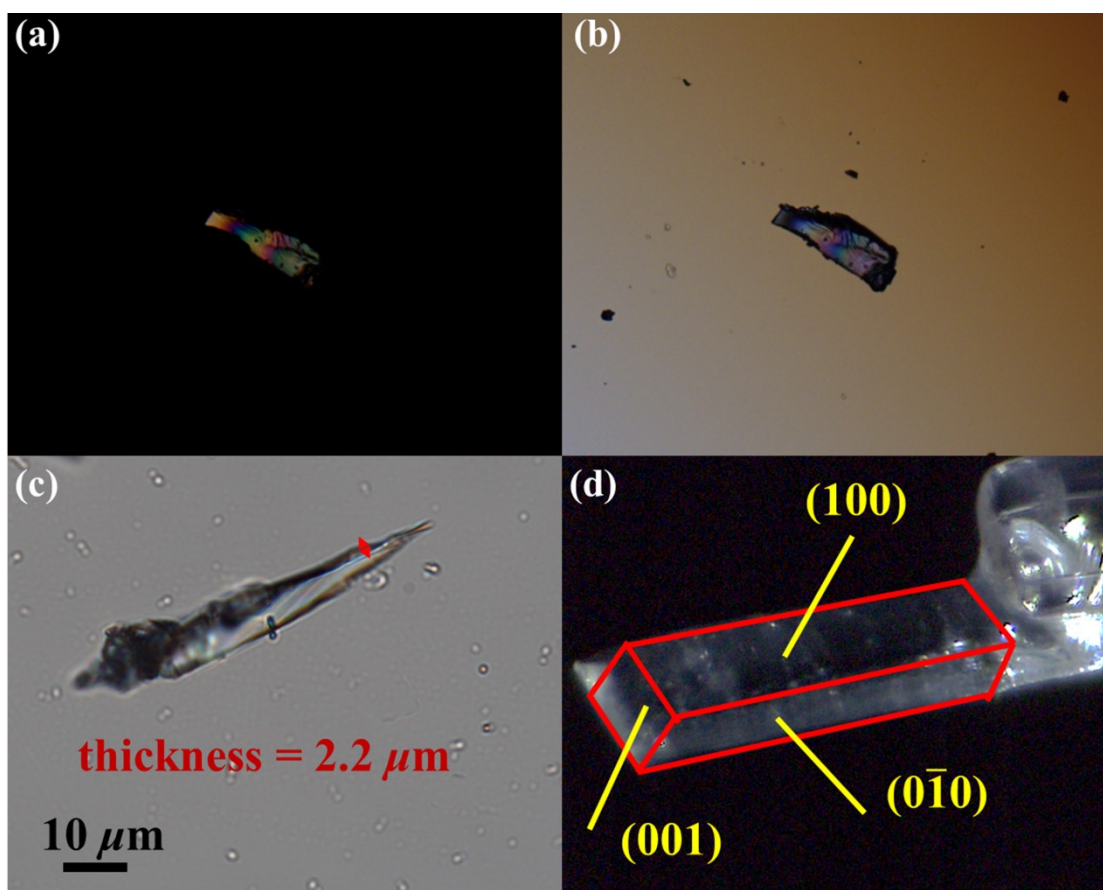

**Figure S6.** (a) Original interference color of the  $\text{Na}_2(\text{C}_4\text{O}_4)(\text{H}_3\text{BO}_3)(\text{H}_2\text{O})_4 \cdot \text{H}_3\text{BO}_3$  crystal under orthogonal polarized light. (b)  $\text{Na}_2(\text{C}_4\text{O}_4)(\text{H}_3\text{BO}_3)(\text{H}_2\text{O})_4 \cdot \text{H}_3\text{BO}_3$  crystal under complete extinction. (c) Thickness of the selected  $\text{Na}_2(\text{C}_4\text{O}_4)(\text{H}_3\text{BO}_3)(\text{H}_2\text{O})_4 \cdot \text{H}_3\text{BO}_3$  crystal plate. (d) Crystal orientation of the  $\text{Na}_2(\text{C}_4\text{O}_4)(\text{H}_3\text{BO}_3)(\text{H}_2\text{O})_4 \cdot \text{H}_3\text{BO}_3$  crystal indexed by single-crystal XRD measurement.

## Reference

- 1 Tauc, J. Absorption edge and internal electric fields in amorphous semiconductors. *Mater. Res. Bull.* **1970**, *5*, 721.
- 2 Kubelka, P.; Munk, F. An article on optics of paint layers. *Z. Tech. Phys.*, **1931**, *12*, 886.
- 3 Sheldrick, G. M. Single-crystal structure validation with the program PLATON SHELXTL Crystallographic Software Package, SHELXTL, version 5.1; Bruker-AXS: Madison, WI, 1998
- 4 Huang, C.; Hu, C. L.; Xu, X.; Yang, B. P.; Mao, J. G. Explorations of a Series of Second Order Nonlinear Optical Materials Based on Monovalent Metal Gold(III) Iodates. *Inorg. Chem.* **2013**, *52*, 11551–11562.
- 5 Yu, J.; Liu, L.; Jin, S.; Zhou, H.; He, X.; Zhang, C.; Zhou, W.; Chen, X.; Wang, X.; Chen, C. T. Superstructure and stacking faults in hydrothermal-grown  $\text{KBe}_2\text{BO}_3\text{F}_2$  crystals. *J. Solid State Chem.* **2011**, *184*, 2790–2793.
- 6 Spek, A. L. Single-crystal Structure Validation with the Program PLATON. *J. Appl. Crystallogr.* **2003**, *36*, 7.
- 7 S. K. Kurtz and T. T. Perry, A Powder Technique for the Evaluation of Nonlinear Optical Materials, *J. Appl. Phys.*, **1968**, *39*, 3798–3813.
- 8 Segall, M. D.; Lindan, P. J. D.; Probert, M. J.; Pickard, C. J.; Hasnip, P. J.; Clark, S. J.; Payne, M. C. First-principles Simulation: Ideas, Illustrations and the CASTEP code. *J. Phys.: Condens. Matter.* **2000**, *14*, 2717.
- 9 Payne, M. C.; Teter, M. P.; Allan, D. C.; Arias, T. A.; Joannopoulos, J. D. Iterative Minimization Techniques Forab Initiototal-energy Calculations: Molecular Dynamics and Conjugate Gradients. *Rev. Mod. Phys.* **1992**, *64*, 1045–1097.
- 10 Clark, S. J.; Segall, M. D.; Pickard, C. J.; Hasnip, P. J.; Probert, M. I.; Refson, K.; Payne, M. C. First principles methods using CASTEP. *Z. Kristallogr.* **2005**, *220*, 567–570.
- 11 Bassani, F.; Parravicini, G. P. Electronic States and Optical Transitions in Solids. *Pergamon Press Ltd. Oxford.* **1976**.
- 12 Gajdoš, M.; Hummer, K.; Kresse, G.; Furthmüller, J.; Bechstedt, F. Linear Optical Properties in the Projector-augmented Wave Methodology. *Phys. Rev. B* **2006**, *73*, 045112.
- 13 Boyd, R. W. *Nonlinear Optics*; Academic Press: 2003.
